# Supplementary material for: Characteristics of debris flows recorded in the Shenmu area of central Taiwan between 2004 and 2021
Source: Copernicus journal article supplement (doi:10.5194/nhess-2022-270), 2023-01-12
Supplement: Supplementary file [file nhess-2022-270-AC1-supplement.pdf]

Dear Anonymous Reviewer,

Thank you for helping me to submit a revised draft of my manuscript titled **Characteristics of debris flows recorded in the Shenmu area of central Taiwan between 2004 and 2021** to *Natural Hazards and Earth System Sciences*. I appreciate the time and effort that you have dedicated to providing your valuable feedback on my manuscript. I am grateful to the reviewer's insightful comments on my paper. I have been able to incorporate changes to reflect most of the suggestions provided by the reviewers. I have highlighted the changes within the manuscript. After the revision, I believe that this study and its outcomes fulfil the scope of journal.

Here is a point-by-point response to the reviewers' comments and concerns.

### **Comments from Reviewer RC1**

The author presented a valuable manuscript for a debris flow monitoring site. However, there are some issues needed to complete the manuscript.

- **Comment 1:** *The abstract should provide a general idea of this study, which includes the importance, the design, the process, and most important the finding from the data. The author should consider rewriting the abstract.*

**Response:** Thank you for your suggestion. This study mainly focuses on the findings of rainfall factors, intensity (I), duration (D) and rainfall thresholds, that could contribute to the global debris-flow database. Another contribution of this study is to provide an overview of debris-flow monitoring system, available options for debris-flow early warning, and important characteristics about the debris flows in the Shenmu area Taiwan. The abstract of this study is revised in the updated manuscript (p. 1).

- **Comment 2:** *The introduction should provide a basic idea of the literature and methods, which is lacking in the present form.*

**Response:** Thank you for your suggestion. This study mainly focuses on the findings of rainfall factors, intensity (I) and duration (D), that could contribute to the global debris-flow database. Another contribution of this study is to provide an overview of debris-flow monitoring system, available options for debris-flow early warning, and important characteristics about the debris flows in the Shenmu area, Taiwan. Therefore, the author reviewed researches about the study area, and provided description and important references regarding the debris-flow monitoring system, types of collected data, and recent

study results about the debris flows in the Shenmu area. The section of Introduction is rearranged and revised in the updated manuscript (p. 1).

- **Comment 3:** *Some names are different in Figure 1 and Figure 2.*

**Response:** Thank you for your suggestion. The name of Shenmu Sta. is corrected in Figure 1, and the name of Chusuei Stream is corrected in Figure 2.

- **Comment 4:** *The author presents the debris period to 2021 but the data shown in tables and figures stopped in 2017.*

**Response:** Thank you for your comment. The period of study is from 2004 to 2021, and there were no debris flows occurred after 2017. Therefore, the data in tables and figures obtained for debris-flow cases stopped in 2017. Additional description about the captured debris-flow events is added in the manuscript (see [Line xxx to xxx](#)).

- **Comment 5:** *In line 66, the author mentions that the Aiyuzi stream is the focus of this study but the manuscript keeps mentioning the other two streams.*

**Response:** Thank you for your comment. There are three potential debris-flow torrents in the Shenmu area. To help readers better understand the local environment and the case history, the author included the description of all three streams in a few paragraphs, as addressed in the Section 2. Other than that, Aiyuzi Stream is the main focus of this study.

- **Comment 6:** *In lines 115 to 116, the rainfall event with 1550 mm is missing in Table 2.*

**Response:** Thank you for your comment. The event of Typhoon of Morakat was included in Table 2, and the author tried to emphasize the extreme impacts of Typhoon Morakat by pointing out the three-day (Aug. 7 to Aug. 9) accumulated rainfall of this event. The value of 1,550 mm is corrected to 1,872 mm in the manuscript after revision (see [Line xxx to xxx](#)). Table 2 shows the average of hourly rainfall based on the durations.

- **Comment 7:** *The landslide increment seems incorrect when comparing Table 1 and Table 3.*

**Response:** Thank you for your comment. Table 1 describes the total landslide areas after Typhoon Morakat in 2009, not the landslide increment. Table 3 shows the annual increment landslide areas, which area the difference between two consecutive years. The unit in Table 1 and Table are changed to m<sup>2</sup>, to avoid confusion and for comparison.

- **Comment 8:** *In line 205, "Different trends" seems the same trend in Fig. 11.*

## Natural Hazards and Earth System Sciences

**Response:** Thank you for your suggestion. The trend line of data from CWB (before 2009) is added to Fig. 11, to be used for comparison between the trends from the data before and after 2009 in the figure.

- **Comment 9:** *In line 216, the velocity before 2009 has only one data and is not the same as 14.4 m/sec in Table 6.*

**Response:** Thank you for your suggestion. The average velocity is estimated before and after 2010, not 2009. The manuscript content has been corrected in the Section 3.4.

- **Comment 10:** *The soil moisture sensor can be withdrawn from the manuscript since there is no good or enough data to analyze.*

**Response:** Thank you for your suggestion. Considering the monitoring system in the study area, the use of soil moisture should be addressed to provide a complete debris-flow warning approach in the study area. Although the soil moisture data may not be useful for debris-flow warning at present, it still can be a part of monitoring system and we continue to collect data for further analysis.

- **Comment 11:** *The findings from the geophone should have more descriptions and discussions with such valuable data.*

**Response:** Thank you for your suggestion. Vibrational signals from geophones are promising for debris-warning based on the research. More detail can be found from the references, and recent study results from the author is added in the Section 3.5.

- **Comment 12:** *The first paragraph of the conclusions says the effective rainfall changed from 250 mm to 300 mm but the result is not shown in the previous part of this manuscript.*

**Response:** Thank you for your suggestion. The description of rainfall thresholds is in the content of Section 3.1, more detail is added, and the paragraph is revised (see [Line xxx to xxx](#)).

- **Comment 13:** *The 3<sup>rd</sup> paragraph of the conclusions says that the frequency of debris flow is different with 1.83 and 0.75 times but cannot be seen in the previous part of this manuscript.*

**Response:** Thank you for your suggestion. The analysis and results are added in the manuscript and the content of Section 2 is revised (see [Line xxx to xxx](#)).

## Additional clarifications

## **Natural Hazards and Earth System Sciences**

In addition to the above comments, all spelling and grammatical errors pointed out by the author and the editing supervisor have been corrected.

I look forward to hearing from you in due time regarding the submission and to respond to any further questions and comments you may have.

Sincerely,

Yi-Min Huang

Jan. 29, 2023
